# Supplementary material for: Cannabidiol improves Nile tilapia cichlid fish welfare
Source: Sci Rep. 2022 Oct 21;12:17650. doi: 10.1038/s41598-022-21759-3 (PMC9586945; doi:10.1038/s41598-022-21759-3)
Supplement: Supplementary file 1 — Supplementary Figure 1. [file 41598_2022_21759_MOESM1_ESM.xlsx]

## Sheet: Acclimatization Week
fishID	treatment	feed consumption (g)
1	control	5.46925
2	control	5.46925
3	control	5.46925
4	control	5.46925
5	control	5.46925
6	control	5.46925
7	control	5.46925
8	control	5.46925
9	control	5.46925
10	control	5.46925
11	control	5.46925
12	control	5.46925
13	control	5.46925
14	control	5.46925
15	control	5.46925
16	CBD1	5.46925
17	CBD1	5.46925
18	CBD1	5.46925
19	CBD1	5.2154
20	CBD1	5.40002
21	CBD1	5.28463
22	CBD1	5.46925
23	CBD1	5.46925
24	CBD1	5.46925
25	CBD1	5.46925
26	CBD1	5.46925
27	CBD1	5.46925
28	CBD1	5.46925
29	CBD1	5.46925
30	CBD1	5.46925
31	CBD10	5.46925
32	CBD10	5.46925
33	CBD10	5.46925
34	CBD10	5.46925
35	CBD10	5.46925
36	CBD10	5.46925
37	CBD10	5.46925
38	CBD10	5.46925
39	CBD10	5.46925
40	CBD10	5.46925
41	CBD10	5.46925
42	CBD10	5.46925
43	CBD10	4.93848
44	CBD10	4.36155
45	CBD10	3.4154
46	CBD20	5.00771
47	CBD20	5.46925
48	CBD20	5.46925
49	CBD20	5.10002
50	CBD20	5.23848
51	CBD20	5.28463
52	CBD20	5.46925
53	CBD20	5.46925
54	CBD20	5.46925
55	CBD20	5.46925
56	CBD20	5.46925
57	CBD20	5.19233
58	CBD20	5.46925
59	CBD20	3.13847
60	CBD20	3.94617

## Sheet: Descriptve statistics - Acclima
feed consumption (g) (N=15)
Treatment	Mean	Standard Deviation
control	5.46925	0
CBD1	5.4354	0.0808148
CBD10	5.22309	0.586645
CBD20	5.11079	0.672853

## Sheet: Week 1 - Week4
fishID	treatment	sampling time point	feed consumption (g)
1	control	week1	5.83848
2	control	week1	5.14617
3	control	week1	5.83848
4	control	week1	5.83848
5	control	week1	5.83848
6	control	week1	5.79233
7	control	week1	5.07694
8	control	week1	5.83848
9	control	week1	5.83848
10	control	week1	5.83848
11	control	week1	5.83848
12	control	week1	5.83848
13	control	week1	5.8154
14	control	week1	5.83848
15	control	week1	4.84617
16	CBD1	week1	5.83848
17	CBD1	week1	5.83848
18	CBD1	week1	5.83848
19	CBD1	week1	3.83078
20	CBD1	week1	5.83848
21	CBD1	week1	5.83848
22	CBD1	week1	5.83848
23	CBD1	week1	5.83848
24	CBD1	week1	5.65387
25	CBD1	week1	5.83848
26	CBD1	week1	5.83848
27	CBD1	week1	4.63848
28	CBD1	week1	5.83848
29	CBD1	week1	5.44617
30	CBD1	week1	5.83848
31	CBD10	week1	5.83848
32	CBD10	week1	5.76925
33	CBD10	week1	5.79233
34	CBD10	week1	5.7231
35	CBD10	week1	5.83848
36	CBD10	week1	5.10002
37	CBD10	week1	5.83848
38	CBD10	week1	5.8154
39	CBD10	week1	4.75386
40	CBD10	week1	5.83848
41	CBD10	week1	4.73079
42	CBD10	week1	5.83848
43	CBD10	week1	4.75386
44	CBD10	week1	5.10002
45	CBD10	week1	4.59232
46	CBD20	week1	4.20001
47	CBD20	week1	5.58463
48	CBD20	week1	4.6154
49	CBD20	week1	4.98463
50	CBD20	week1	5.83848
51	CBD20	week1	5.83848
52	CBD20	week1	5.83848
53	CBD20	week1	5.83848
54	CBD20	week1	5.53848
55	CBD20	week1	5.83848
56	CBD20	week1	5.83848
57	CBD20	week1	3.96924
58	CBD20	week1	5.16925
59	CBD20	week1	4.54617
60	CBD20	week1	5.44617
1	control	week2	5.83848
2	control	week2	5.67694
3	control	week2	5.26156
4	control	week2	5.7231
5	control	week2	5.83848
6	control	week2	5.83848
7	control	week2	2.07693
8	control	week2	5.76925
9	control	week2	5.83848
10	control	week2	5.7231
11	control	week2	5.76925
12	control	week2	5.83848
13	control	week2	5.65387
14	control	week2	5.76925
15	control	week2	4.93848
16	CBD1	week2	5.67694
17	CBD1	week2	5.83848
18	CBD1	week2	5.76925
19	CBD1	week2	4.40771
20	CBD1	week2	5.60771
21	CBD1	week2	5.83848
22	CBD1	week2	5.83848
23	CBD1	week2	5.83848
24	CBD1	week2	5.79233
25	CBD1	week2	5.28463
26	CBD1	week2	5.83848
27	CBD1	week2	4.96156
28	CBD1	week2	5.28463
29	CBD1	week2	4.9154
30	CBD1	week2	5.83848
31	CBD10	week2	5.83848
32	CBD10	week2	5.44617
33	CBD10	week2	5.70002
34	CBD10	week2	5.67694
35	CBD10	week2	5.83848
36	CBD10	week2	5.35386
37	CBD10	week2	5.83848
38	CBD10	week2	5.83848
39	CBD10	week2	5.83848
40	CBD10	week2	5.83848
41	CBD10	week2	5.49233
42	CBD10	week2	5.83848
43	CBD10	week2	3.90001
44	CBD10	week2	5.83848
45	CBD10	week2	4.73079
46	CBD20	week2	3.48463
47	CBD20	week2	4.75386
48	CBD20	week2	3.64617
49	CBD20	week2	4.82309
50	CBD20	week2	5.83848
51	CBD20	week2	5.83848
52	CBD20	week2	5.83848
53	CBD20	week2	5.83848
54	CBD20	week2	5.83848
55	CBD20	week2	5.83848
56	CBD20	week2	5.83848
57	CBD20	week2	4.68463
58	CBD20	week2	5.05386
59	CBD20	week2	5.03079
60	CBD20	week2	5.83848
1	control	week3	5.83848
2	control	week3	5.83848
3	control	week3	5.76925
4	control	week3	5.83848
5	control	week3	5.83848
6	control	week3	5.83848
7	control	week3	5.07694
8	control	week3	5.83848
9	control	week3	5.83848
10	control	week3	5.65387
11	control	week3	5.46925
12	control	week3	3.64617
13	control	week3	5.83848
14	control	week3	5.79233
15	control	week3	3.18463
16	CBD1	week3	4.98463
17	CBD1	week3	5.83848
18	CBD1	week3	5.83848
19	CBD1	week3	3.87694
20	CBD1	week3	5.70002
21	CBD1	week3	5.83848
22	CBD1	week3	5.83848
23	CBD1	week3	5.83848
24	CBD1	week3	5.83848
25	CBD1	week3	4.93848
26	CBD1	week3	5.83848
27	CBD1	week3	3.13847
28	CBD1	week3	4.9154
29	CBD1	week3	4.70771
30	CBD1	week3	5.83848
31	CBD10	week3	5.83848
32	CBD10	week3	5.03079
33	CBD10	week3	5.8154
34	CBD10	week3	4.86925
35	CBD10	week3	5.83848
36	CBD10	week3	4.24617
37	CBD10	week3	5.44617
38	CBD10	week3	5.83848
39	CBD10	week3	3.94617
40	CBD10	week3	5.83848
41	CBD10	week3	4.24617
42	CBD10	week3	5.67694
43	CBD10	week3	3.66924
44	CBD10	week3	5.7231
45	CBD10	week3	4.26924
46	CBD20	week3	3.73847
47	CBD20	week3	5.14617
48	CBD20	week3	2.28462
49	CBD20	week3	4.56925
50	CBD20	week3	5.83848
51	CBD20	week3	5.83848
52	CBD20	week3	5.83848
53	CBD20	week3	5.83848
54	CBD20	week3	5.83848
55	CBD20	week3	5.83848
56	CBD20	week3	5.83848
57	CBD20	week3	5.37694
58	CBD20	week3	5.7231
59	CBD20	week3	5.10002
60	CBD20	week3	4.56925
1	control	week4	5.83848
2	control	week4	5.83848
3	control	week4	4.56925
4	control	week4	5.74617
5	control	week4	5.83848
6	control	week4	5.83848
7	control	week4	5.79233
8	control	week4	5.40002
9	control	week4	5.7231
10	control	week4	5.83848
11	control	week4	5.60771
12	control	week4	5.83848
13	control	week4	5.83848
14	control	week4	5.35386
15	control	week4	2.81539
16	CBD1	week4	5.7231
17	CBD1	week4	5.83848
18	CBD1	week4	5.83848
19	CBD1	week4	3.80771
20	CBD1	week4	5.83848
21	CBD1	week4	5.83848
22	CBD1	week4	5.83848
23	CBD1	week4	5.83848
24	CBD1	week4	4.89232
25	CBD1	week4	3.18463
26	CBD1	week4	5.83848
27	CBD1	week4	3.00001
28	CBD1	week4	3.27693
29	CBD1	week4	5.14617
30	CBD1	week4	5.83848
31	CBD10	week4	5.83848
32	CBD10	week4	4.96156
33	CBD10	week4	5.83848
34	CBD10	week4	3.92309
35	CBD10	week4	5.37694
36	CBD10	week4	3.90001
37	CBD10	week4	5.83848
38	CBD10	week4	5.83848
39	CBD10	week4	4.6154
40	CBD10	week4	5.83848
41	CBD10	week4	2.56155
42	CBD10	week4	5.56156
43	CBD10	week4	3.5077
44	CBD10	week4	5.83848
45	CBD10	week4	5.7231
46	CBD20	week4	4.40771
47	CBD20	week4	5.63079
48	CBD20	week4	4.59232
49	CBD20	week4	2.81539
50	CBD20	week4	5.83848
51	CBD20	week4	5.83848
52	CBD20	week4	5.83848
53	CBD20	week4	5.83848
54	CBD20	week4	5.83848
55	CBD20	week4	5.83848
56	CBD20	week4	5.8154
57	CBD20	week4	5.26156
58	CBD20	week4	5.14617
59	CBD20	week4	4.29232
60	CBD20	week4	4.08463

## Sheet: Descriptve statistics - Week1-4
feed consumption (g) (N=15)
Treatment	Sampling time point	Mean	Standard Deviation
control	week1	5.67079	0.340668
CBD1	week1	5.58617	0.579653
CBD10	week1	5.42156	0.509673
CBD20	week1	5.27233	0.655848
control	week2	5.43694	0.962689
CBD1	week2	5.5154	0.447395
CBD10	week2	5.53386	0.544232
CBD20	week2	5.21233	0.813835
control	week3	5.42002	0.8443
CBD1	week3	5.26463	0.840372
CBD10	week3	5.08617	0.806932
CBD20	week3	5.15848	1.02039
control	week4	5.45848	0.805708
CBD1	week4	5.04925	1.12852
CBD10	week4	5.01079	1.06533
CBD20	week4	5.13848	0.914621

## Sheet: Week 5
fishID	treatment	feed consumption (g)
2	control	5.28463
3	control	4.06155
4	control	5.79233
5	control	5.7231
6	control	5.65387
7	control	4.82309
8	control	4.03848
9	control	5.83848
10	control	5.83848
12	control	5.83848
13	control	5.83848
14	control	4.77694
16	CBD1	5.37694
17	CBD1	5.83848
19	CBD1	3.43847
20	CBD1	3.78463
21	CBD1	5.76925
23	CBD1	5.83848
24	CBD1	4.33848
25	CBD1	3.99232
27	CBD1	3.43847
28	CBD1	3.62309
29	CBD1	3.55386
30	CBD1	5.49233
32	CBD10	4.82309
33	CBD10	5.16925
34	CBD10	3.25386
35	CBD10	5.12309
36	CBD10	3.87694
37	CBD10	5.65387
38	CBD10	5.83848
39	CBD10	3.90001
40	CBD10	5.83848
41	CBD10	2.76924
42	CBD10	5.83848
44	CBD10	5.83848
46	CBD20	2.97693
47	CBD20	4.29232
49	CBD20	3.1154
50	CBD20	5.83848
51	CBD20	3.39232
52	CBD20	5.83848
53	CBD20	5.83848
54	CBD20	5.83848
55	CBD20	5.83848
56	CBD20	5.70002
57	CBD20	5.49233
58	CBD20	3.76155
59	CBD20	4.66155
60	CBD20	3.92309

## Sheet: Descriptve statistics - Week 5
feed consumption (g) (N=14)
Treatment	Mean	Standard Deviation
control	5.29233	0.696238
CBD1	4.5404	1.02875
CBD10	4.82694	1.10585
CBD20	4.75057	1.14067
