# Supplementary material for: Cannabidiol improves Nile tilapia cichlid fish welfare
Source: Sci Rep. 2022 Oct 21;12:17650. doi: 10.1038/s41598-022-21759-3 (PMC9586945; doi:10.1038/s41598-022-21759-3)
Supplement: Supplementary file 2 — Supplementary Figure 2. [file 41598_2022_21759_MOESM2_ESM.xlsx]

## Sheet: Data set
fishID	treatment	sampling time point	atacks	latency 1st aggressive behavior (s)
1	control	basal	119	14
2	control	basal	122	386
3	control	basal	0	600
4	control	basal	65	22
5	control	basal	0	600
6	control	basal	0	600
7	control	basal	107	61
8	control	basal	114	31
9	control	basal	78	34
10	control	basal	0	600
11	control	basal	0	600
12	control	basal	122	76
13	control	basal	59	47
14	control	basal	67	44
16	CBD1	basal	114	45
17	CBD1	basal	0	600
18	CBD1	basal	35	274
19	CBD1	basal	103	8
20	CBD1	basal	0	600
21	CBD1	basal	39	188
22	CBD1	basal	154	0
23	CBD1	basal	9	125
24	CBD1	basal	5	482
25	CBD1	basal	36	26
26	CBD1	basal	83	7
27	CBD1	basal	143	48
28	CBD1	basal	34	184
29	CBD1	basal	0	600
30	CBD1	basal	92	26
31	CBD10	basal	148	0
32	CBD10	basal	43	261
33	CBD10	basal	85	5
34	CBD10	basal	55	54
36	CBD10	basal	42	163
37	CBD10	basal	176	7
38	CBD10	basal	135	95
41	CBD10	basal	143	20
42	CBD10	basal	115	16
43	CBD10	basal	14	383
44	CBD10	basal	133	23
45	CBD10	basal	74	97
46	CBD20	basal	85	26
47	CBD20	basal	128	12
48	CBD20	basal	123	21
49	CBD20	basal	39	72
50	CBD20	basal	114	37
51	CBD20	basal	42	24
52	CBD20	basal	69	57
53	CBD20	basal	125	68
54	CBD20	basal	0	600
55	CBD20	basal	20	121
56	CBD20	basal	96	114
57	CBD20	basal	11	9
58	CBD20	basal	0	600
59	CBD20	basal	113	40
60	CBD20	basal	7	583
1	control	week1	49	44
2	control	week1	92	85
3	control	week1	34	80
4	control	week1	50	33
5	control	week1	0	600
6	control	week1	62	27
7	control	week1	104	90
8	control	week1	92	20
9	control	week1	74	17
10	control	week1	0	600
11	control	week1	10	35
12	control	week1	84	18
13	control	week1	27	20
14	control	week1	40	72
16	CBD1	week1	169	5
17	CBD1	week1	114	16
18	CBD1	week1	34	28
19	CBD1	week1	110	26
20	CBD1	week1	0	600
21	CBD1	week1	39	9
22	CBD1	week1	244	2
23	CBD1	week1	61	16
24	CBD1	week1	55	62
25	CBD1	week1	1	61
26	CBD1	week1	58	8
27	CBD1	week1	121	15
28	CBD1	week1	45	21
29	CBD1	week1	18	71
30	CBD1	week1	31	19
31	CBD10	week1	46	45
32	CBD10	week1	12	484
33	CBD10	week1	0	600
34	CBD10	week1	136	1
36	CBD10	week1	22	144
37	CBD10	week1	6	180
38	CBD10	week1	55	120
41	CBD10	week1	167	1
42	CBD10	week1	76	3
43	CBD10	week1	36	31
44	CBD10	week1	56	37
45	CBD10	week1	0	600
46	CBD20	week1	93	5
47	CBD20	week1	122	4
48	CBD20	week1	183	0
49	CBD20	week1	52	170
50	CBD20	week1	35	16
51	CBD20	week1	39	29
52	CBD20	week1	70	78
53	CBD20	week1	0	600
54	CBD20	week1	56	217
55	CBD20	week1	5	492
56	CBD20	week1	103	82
57	CBD20	week1	17	2
58	CBD20	week1
59	CBD20	week1	64	181
60	CBD20	week1	0	600
1	control	week2	95	6
2	control	week2	110	91
3	control	week2	13	286
4	control	week2	54	3
5	control	week2	10	3
6	control	week2	24	45
7	control	week2	0	600
8	control	week2	94	2
9	control	week2	92	0
10	control	week2	48	56
11	control	week2	53	23
12	control	week2	227	81
13	control	week2	20	22
14	control	week2	69	33
16	CBD1	week2	101	3
17	CBD1	week2	140	51
18	CBD1	week2	24	11
19	CBD1	week2	128	13
20	CBD1	week2	31	115
21	CBD1	week2	37	4
22	CBD1	week2	95	3
23	CBD1	week2	66	30
24	CBD1	week2	0	600
25	CBD1	week2	6	430
26	CBD1	week2	60	3
27	CBD1	week2	117	20
28	CBD1	week2	15	62
29	CBD1	week2	83	134
30	CBD1	week2	18	7
31	CBD10	week2	21	218
32	CBD10	week2	33	64
33	CBD10	week2	25	104
34	CBD10	week2	43	9
36	CBD10	week2	0	600
37	CBD10	week2	0	600
38	CBD10	week2	129	62
41	CBD10	week2	0	600
42	CBD10	week2	176	7
43	CBD10	week2	16	106
44	CBD10	week2	117	6
45	CBD10	week2	0	600
46	CBD20	week2	90	11
47	CBD20	week2	187	1
48	CBD20	week2	142	21
49	CBD20	week2	30	277
50	CBD20	week2	44	4
51	CBD20	week2	41	8
52	CBD20	week2	25	353
53	CBD20	week2	165	38
54	CBD20	week2	33	9
55	CBD20	week2	14	296
56	CBD20	week2	142	21
57	CBD20	week2	10	25
58	CBD20	week2	41	37
59	CBD20	week2	50	100
60	CBD20	week2	0	600
1	control	week3	106	1
2	control	week3	156	4
3	control	week3	17	33
4	control	week3	55	3
5	control	week3	68	113
6	control	week3	61	4
7	control	week3	41	58
8	control	week3	59	9
9	control	week3	70	3
10	control	week3	29	3
11	control	week3	120	3
12	control	week3	127	2
13	control	week3	5	147
14	control	week3	76	11
16	CBD1	week3	66	2
17	CBD1	week3
18	CBD1	week3	2	49
19	CBD1	week3	147	18
20	CBD1	week3	0	600
21	CBD1	week3	22	26
22	CBD1	week3	48	1
23	CBD1	week3	71	74
24	CBD1	week3	5	11
25	CBD1	week3	1	24
26	CBD1	week3	15	1
27	CBD1	week3	57	8
28	CBD1	week3	15	15
29	CBD1	week3	136	32
30	CBD1	week3	8	47
31	CBD10	week3	8	47
32	CBD10	week3	66	75
33	CBD10	week3	29	22
34	CBD10	week3	79	3
36	CBD10	week3	0	600
37	CBD10	week3	0	600
38	CBD10	week3	78	5
41	CBD10	week3	0	600
42	CBD10	week3	35	1
43	CBD10	week3	5	8
44	CBD10	week3	42	36
45	CBD10	week3	8	53
46	CBD20	week3	68	5
47	CBD20	week3	190	1
48	CBD20	week3	226	4
49	CBD20	week3	12	65
50	CBD20	week3	3	12
51	CBD20	week3	32	24
52	CBD20	week3	46	21
53	CBD20	week3	151	5
54	CBD20	week3	66	2
55	CBD20	week3	28	19
56	CBD20	week3	42	18
57	CBD20	week3	2	1
58	CBD20	week3	27	6
59	CBD20	week3	0	600
60	CBD20	week3	35	44
1	control	week4	108	3
2	control	week4	142	45
3	control	week4	53	3
4	control	week4	86	3
5	control	week4	18	43
6	control	week4	79	2
7	control	week4	24	146
8	control	week4	23	20
9	control	week4	84	1
10	control	week4	58	1
11	control	week4	72	1
12	control	week4	14	36
13	control	week4	9	36
14	control	week4	0	600
16	CBD1	week4	96	1
17	CBD1	week4	180	20
18	CBD1	week4	2	28
19	CBD1	week4	110	16
20	CBD1	week4	38	250
21	CBD1	week4	11	26
22	CBD1	week4	0	600
23	CBD1	week4	13	44
24	CBD1	week4	21	16
25	CBD1	week4	5	29
26	CBD1	week4	10	4
27	CBD1	week4	43	2
28	CBD1	week4	0	600
29	CBD1	week4	77	68
30	CBD1	week4	4	136
31	CBD10	week4	17	4
32	CBD10	week4	47	21
33	CBD10	week4	29	6
34	CBD10	week4	85	16
36	CBD10	week4	0	600
37	CBD10	week4	0	600
38	CBD10	week4	63	23
41	CBD10	week4	0	600
42	CBD10	week4	0	600
43	CBD10	week4	23	1
44	CBD10	week4	52	10
45	CBD10	week4	0	600
46	CBD20	week4	80	2
47	CBD20	week4	263	1
48	CBD20	week4	195	2
49	CBD20	week4	108	120
50	CBD20	week4	10	379
51	CBD20	week4	30	3
52	CBD20	week4	43	8
53	CBD20	week4	227	0
54	CBD20	week4	55	3
55	CBD20	week4	30	3
56	CBD20	week4	0	600
57	CBD20	week4	11	5
58	CBD20	week4	46	15
59	CBD20	week4	9	564
60	CBD20	week4	0	600

## Sheet: Descriptve statistics
Number of attacks (N=15)					Latency 1st aggressive behavior (s) (N=15)
Treatment	Sampling Time Point	Mean	Standard Deviation		Treatment	Sampling Time Point	Mean	Standard Deviation
control	basal	60.9286	51.6504		control	basal	265.357	274.511
CBD1	basal	56.4667	53.8515		CBD1	basal	214.2	237.516
CBD10	basal	96.9167	51.6007		CBD10	basal	93.6667	120.116
CBD20	basal	64.8	49.9817		CBD20	basal	158.933	227.811
control	week1	51.2857	34.8434		control	week1	124.357	203.204
CBD1	week1	73.3333	67.2232		CBD1	week1	63.9333	149.873
CBD10	week1	51	53.2456		CBD10	week1	187.167	234.672
CBD20	week1	59.9286	52.0702		CBD20	week1	176.857	223.067
control	week2	64.9286	58.8145		control	week2	89.3571	164.591
CBD1	week2	61.4	46.817		CBD1	week2	99.0667	176.675
CBD10	week2	46.6667	59.8731		CBD10	week2	248	266.225
CBD20	week2	67.6	38.0307		CBD20	week2	120.067	220.448
control	week3	70.7143	43.3739		control	week3	28.1429	46.4242
CBD1	week3	42.3571	48.8051		CBD1	week3	64.8571	155.467
CBD10	week3	29.1667	30.8304		CBD10	week3	170.833	259.775
CBD20	week3	61.8667	70.3784		CBD20	week3	55.1333	151.78
control	week4	55	42.2757		control	week4	67.1429	158.139
CBD1	week4	40.6667	52.7848		CBD1	week4	122.667	204.43
CBD10	week4	26.3333	29.302		CBD10	week4	256.75	303.065
CBD20	week4	73.8	86.2647		CBD20	week4	153.667	245.282
