# Supplementary material for: Cannabidiol improves Nile tilapia cichlid fish welfare
Source: Sci Rep. 2022 Oct 21;12:17650. doi: 10.1038/s41598-022-21759-3 (PMC9586945; doi:10.1038/s41598-022-21759-3)
Supplement: Supplementary file 3 — Supplementary Figure 3. [file 41598_2022_21759_MOESM3_ESM.xlsx]

## Sheet: Data set
fishID	treatment	VR pre-confinement (beats/min)	VR post-confinement (beats/min)	ΔVR (beats/min)	log-transformed - VR post-confinement
2	control	99.7783	120.684	20.9056	2.08523
4	control	109.556	158.73	49.1745	2.20339
5	control	91.301	106.635	15.334	2.03195
6	control	92.5688	128.755	36.1866	2.11313
7	control	110.092	125.523	15.4313	2.10217
8	control	105.51	103.359	-2.15079	2.01853
9	control	81.3008	84.7857	3.48487	1.93341
10	control	82.5877	104.895	22.3074	2.02488
12	control	97.0612	100.418	3.35721	2.00612
13	control	100.251	105.976	5.72523	2.02929
14	control	92.8793	102.215	9.33539	2.01374
16	CBD1	99.5851	109.223	9.63824	2.04227
17	CBD1	87.5274	91.3474	3.82002	1.96542
19	CBD1	96.3597	109.157	12.7973	2.04201
20	CBD1	115.311	112.641	-2.6699	2.05553
21	CBD1	123.414	138.09	14.6753	2.1433
23	CBD1	94.8867	124.827	29.94	2.09977
24	CBD1	139.104	144.928	5.82398	2.16414
25	CBD1	116.467	121.498	5.03132	2.08813
27	CBD1	91.7665	99.283	7.51645	2.00123
28	CBD1	99.3926	99.5025	0.109887	2.00218
29	CBD1	104.865	125.13	20.2658	2.10082
30	CBD1	109.79	122.034	12.2443	2.09002
32	CBD10	100.615	110.94	10.325	2.04898
33	CBD10	87.2939	89.0869	1.79297	1.95466
34	CBD10	98.5761	106.226	7.6499	2.0303
35	CBD10	111.94	122.658	10.7173	2.09222
36	CBD10	97.2447	98.5491	1.30441	1.99804
37	CBD10	93.7012	84.9457	-8.75547	1.93422
38	CBD10	87.6126	93.4094	5.79689	1.97502
39	CBD10	182.556	168.618	-13.9375	2.22947
40	CBD10	108.663	94.2162	-14.4467	1.97871
41	CBD10	114.322	143.255	28.9331	2.15913
42	CBD10	94.1915	111.317	17.1257	2.05045
44	CBD10	105.634	102.447	-3.18645	2.01472
46	CBD20	97.271	103.717	6.4455	2.02002
47	CBD20	133.829	136.106	2.27686	2.13706
49	CBD20	128.388	155.172	26.7844	2.1936
50	CBD20	111.628	116.167	4.5386	2.0688
51	CBD20	84.2499	82.3045	-1.94541	1.92067
52	CBD20	101.437	98.8739	-2.56309	1.99945
53	CBD20	79.9822	79.5229	-0.459363	1.90592
54	CBD20	104.834	121.253	16.4189	2.08726
55	CBD20	97.035	109.589	12.554	2.04371
56	CBD20	108.992	112.01	3.01813	2.05312
57	CBD20	133.879	115.274	-18.605	2.06548
58	CBD20	112.782	123.542	10.7596	2.09531
59	CBD20	116.769	101.294	-15.4751	2.00985
60	CBD20	100.699	95.3137	-5.38556	1.98369

## Sheet: Descriptve statistics
VR pre-confinement (beats/min) (N=14)				VR post-confinement (beats/min) (N=14)				ΔVR (beats/min) (N=14)				log-transformed - VR post-confinement (N=14)
Treatment	Mean	Standard Deviation		Treatment	Mean	Standard Deviation		Treatment	Mean	Standard Deviation		Treatment	Mean	Standard Deviation
control	96.6259	9.70299		control	112.907	19.6835		control	16.281	15.3873		control	2.05108	0.0711839
CBD1	106.539	14.932		CBD1	116.472	15.9927		CBD1	9.93273	8.95754		CBD1	2.06624	0.0592813
CBD10	106.862	25.4114		CBD10	110.472	24.2974		CBD10	3.60993	12.729		CBD10	2.03883	0.0863066
CBD20	107.984	16.5419		CBD20	110.724	20.0871		CBD20	2.74018	12.729		CBD20	2.04171	0.0775947
