# Supplementary material for: Cannabidiol improves Nile tilapia cichlid fish welfare
Source: Sci Rep. 2022 Oct 21;12:17650. doi: 10.1038/s41598-022-21759-3 (PMC9586945; doi:10.1038/s41598-022-21759-3)
Supplement: Supplementary file 4 — Supplementary Figure 4. [file 41598_2022_21759_MOESM4_ESM.xlsx]

## Sheet: Baseline cortisol -day 29
treatment	cortisol baseline level (ng/ml)	log-transformed cortisol baseline level
control	95.502	1.98454
control	7.207	0.914184
control	21.194	1.34624
control	16.468	1.24224
control	39.478	1.60722
control	126.927	2.10696
control	46.134	1.67333
control	87.356	1.94624
CBD1
CBD1	42.363	1.63712
CBD1	26.687	1.44228
CBD1	9.481	1.0204
CBD1
CBD1	8.952	0.99791
CBD1	24.904	1.41337
CBD1
CBD10	5.99	0.844477
CBD10	1.434	0.386321
CBD10	41.689	1.63032
CBD10	2.674	0.565139
CBD10	27.114	1.44892
CBD10	6.793	0.891705
CBD10	34.161	1.54606
CBD10	2.181	0.502564
CBD20
CBD20	2.021	0.480151
CBD20	18.898	1.29881
CBD20	3.116	0.614475
CBD20	2.112	0.49304
CBD20	0.818	0.259594
CBD20	5.366	0.803867
CBD20	3.141	0.617105

## Sheet: Descriptve statistics - day 29
cortisol baseline level (ng/ml) (N=8)				log-transformed cortisol baseline level (N=8)
Treatment	Mean	Standard Deviation		Treatment	Mean	Standard Deviation
control	55.0333	43.2469		control	1.60262	0.412806
CBD1	22.4774	13.8824		CBD1	1.30222	0.281137
CBD10	15.2545	16.3642		CBD10	0.976938	0.49883
CBD20	5.06743	0.329857		CBD20	0.652434	0.329857

## Sheet: Stress-induced cortisol -day 35
treatment	cortisol stress-induced level (ng/ml)	log-transformed cortisol stress-induced level
control	43.91	1.65234
control	57.854	1.76978
control	13.83	1.17114
control	9.552	1.02333
control	13.662	1.16619
control	21.3	1.3483
control	17.637	1.27038
control	75.403	1.88311
CBD1		0
CBD1	35.697	1.56463
CBD1	46.316	1.67501
CBD1	2.044	0.483445
CBD1	7.304	0.919287
CBD1	20.412	1.33066
CBD1	65.331	1.82172
CBD1	10.689	1.06778
CBD10	17.211	1.26033
CBD10	26.384	1.4375
CBD10	27.857	1.46025
CBD10	22.048	1.36263
CBD10	13.495	1.16122
CBD10	20.88	1.34005
CBD10	13.746	1.16867
CBD10	1.582	0.411956
CBD20	2.507	0.544936
CBD20	1.372	0.375115
CBD20	28.423	1.46869
CBD20	16.423	1.24112
CBD20	13.914	1.17359
CBD20	37.129	1.58126
CBD20	5.048	0.781612
CBD20	17.589	1.26926

## Sheet: Descriptve statistics - day 35
cortisol stress-induced level (ng/ml) (N=8)				log-transformed cortisol stress-induced level (N=8)
Treatment	Mean	Standard Deviation		Treatment	Mean	Standard Deviation
control	31.6435	24.4488		control	1.41057	0.316523
CBD1	26.8276	23.2307		CBD1	1.26607	0.626092
CBD10	17.9004	8.45676		CBD10	1.31295	0.337498
CBD20	15.3006	12.6485		CBD20	1.05445	0.4375
