# Supplementary material for: Cannabidiol improves Nile tilapia cichlid fish welfare
Source: Sci Rep. 2022 Oct 21;12:17650. doi: 10.1038/s41598-022-21759-3 (PMC9586945; doi:10.1038/s41598-022-21759-3)
Supplement: Supplementary file 5 — Supplementary Figure 5. [file 41598_2022_21759_MOESM5_ESM.xlsx]

## Sheet: Data set
treatment	gonadosomatic index (%)
control	0.884001
control	0.232761
control	0.57398
control	0.267548
control	0.137457
control	0.191486
control	0.372497
control	0.345224
control	0.733038
control	0.168968
CBD1	0.374659
CBD1	0.496988
CBD1
CBD1	0.525496
CBD1	0.0878477
CBD1	0.248092
CBD1	0.547445
CBD1	0.940734
CBD1	1.13478
CBD10	1.0865
CBD10	0.816327
CBD10	0.555828
CBD10	1.07724
CBD10	0.422741
CBD10	0.785634
CBD10	1.06111
CBD10	0.745814
CBD10	1.15993
CBD10	1.029
CBD20	1.08235
CBD20	1.35897
CBD20	0.648276
CBD20	1.01346
CBD20	0.704225
CBD20	0.957143
CBD20	1.57812
CBD20	0.997783
CBD20	1.16945
CBD20	0.944487

## Sheet: Descriptve statistics
gonadosomatic index (%) (N=10)
Treatment	Mean	Standard Deviation
control	0.390696	0.255957
CBD1	0.544506	0.345026
CBD10	0.874012	0.249374
CBD20	1.04543	0.277738
