# Supplementary material for: Cannabidiol improves Nile tilapia cichlid fish welfare
Source: Sci Rep. 2022 Oct 21;12:17650. doi: 10.1038/s41598-022-21759-3 (PMC9586945; doi:10.1038/s41598-022-21759-3)
Supplement: Supplementary file 6 — Supplementary Figure 6. [file 41598_2022_21759_MOESM6_ESM.xlsx]

## Sheet: Data set
treatment	spermatozoa number	log-trasformed spermatozoa number
control	209.5	2.32325
control	78.1	1.89818
control	92	1.96848
control	178.9	2.25503
control	48.85	1.69767
CBD1	3.75	0.676694
CBD1	5.6	0.819544
CBD1	1.8	0.447158
CBD1	0.55	0.190332
CBD10	63.1667	1.80731
CBD10	20.5	1.33244
CBD10	5.85	0.835691
CBD20	169.9	2.23274
CBD20	38.25	1.59384
CBD20	28.05	1.46315
CBD20	61.65	1.79692
CBD20	68.25	1.84042

## Sheet: Descriptve statistics
spermatozoa number (N=5)				log-trasformed spermatozoa number (N=5)
Treatment	Mean	Standard Deviation		Treatment	Mean	Standard Deviation
control	121.47	69.0481		control	2.02852	0.258956
CBD1	2.925	2.21679		CBD1	0.533432	0.275406
CBD10	29.8389	29.7777		CBD10	1.32515	0.485851
CBD20	73.22	56.4996		CBD20	1.78541	0.29318
