# Supplementary material for: Cannabidiol improves Nile tilapia cichlid fish welfare
Source: Sci Rep. 2022 Oct 21;12:17650. doi: 10.1038/s41598-022-21759-3 (PMC9586945; doi:10.1038/s41598-022-21759-3)
Supplement: Supplementary file 7 — Supplementary Table 1. [file 41598_2022_21759_MOESM7_ESM.xlsx]

## Sheet: Data set
fishID	treatment	sampling time point	VR pre-social stimulus (beats/min)	VR post-social stimulus (beats/min)	ΔVR (beats/min)
1	control	basal	100.223	130.34	30.1176
2	control	basal	128.986	130.909	1.92306
3	control	basal	114.54	168.856	54.3153
4	control	basal	109.356	99.2282	-10.1278
5	control	basal	111.283	157	45.7167
6	control	basal	153.061	179.372	26.311
7	control	basal	115.348	113.96	-1.38753
8	control	basal	120.522	143.827	23.3051
9	control	basal	99.9722	112.219	12.2472
10	control	basal	114.943	155.106	40.163
11	control	basal	127.119	126.761	-0.358081
12	control	basal	130.152	125.087	-5.06498
13	control	basal	121.049	104.287	-16.7617
14	control	basal	102.945	105.789	2.84363
15	control	basal	140.68	177.165	36.4854
16	CBD1	basal	92.6402	91.3938	-1.24649
17	CBD1	basal	106.698	131.339	24.6406
18	CBD1	basal	116.618	144.753	28.1346
19	CBD1	basal	122.909	127.074	4.16493
20	CBD1	basal	107.72	158.103	50.3828
21	CBD1	basal	136.882	106.603	-30.2786
22	CBD1	basal	103.27	138.675	35.4047
23	CBD1	basal	118.11	131.675	13.565
24	CBD1	basal	134.831	141.732	6.90082
25	CBD1	basal	155.373	158.311	2.93802
26	CBD1	basal	105.263	107.047	1.78412
27	CBD1	basal	93.1918	129.496	36.3046
28	CBD1	basal	116.58	103.093	-13.4875
29	CBD1	basal	129.403	120.24	-9.16283
30	CBD1	basal	101.637	119.76	18.123
31	CBD10	basal	111.317	112.15	0.832279
32	CBD10	basal	91.1623	119.601	28.439
33	CBD10	basal	97.3236	89.441	-7.88261
34	CBD10	basal	98.1997	123.542	25.3419
35	CBD10	basal	133.185	152.091	18.9059
36	CBD10	basal	118.577	139.535	20.9578
37	CBD10	basal	112.43	106.477	-5.95236
38	CBD10	basal	159.011	135.338	-23.6723
39	CBD10	basal	159.858	164.159	4.30078
40	CBD10	basal	103.926	130.011	26.0847
41	CBD10	basal	130.152	133.531	3.37931
42	CBD10	basal	106.32	98.9283	-7.39186
43	CBD10	basal	129.964	138.675	8.71099
44	CBD10	basal	78.329	86.5177	8.18868
45	CBD10	basal	128.023	148.637	20.6147
46	CBD20	basal	114.906	109.058	-5.84798
47	CBD20	basal	124.01	148.637	24.6278
48	CBD20	basal	112.465	113.386	0.920972
49	CBD20	basal	117.379	143.255	25.8765
50	CBD20	basal	96.4114	86.6843	-9.72703
51	CBD20	basal	90.978	87.6126	-3.36546
52	CBD20	basal	123.669	109.323	-14.346
53	CBD20	basal	113.03	111.801	-1.22859
54	CBD20	basal	107.431	98.8468	-8.58383
55	CBD20	basal	103.3	133.333	30.0335
56	CBD20	basal	108.63	116.618	7.98802
57	CBD20	basal	122.158	124.01	1.85152
58	CBD20	basal	119.641	130.199	10.5578
59	CBD20	basal	106.572	111.801	5.22931
60	CBD20	basal	105.417	116.845	11.4279
1	control	week1	112.36	122.241	9.88154
2	control	week1	90.4977	90.9091	0.411353
3	control	week1	120.401	120.2	-0.201004
4	control	week1	89.2414	86.0421	-3.19938
5	control	week1	100.699	147.905	47.2054
6	control	week1	132.989	138.568	5.57958
7	control	week1	83.877	87.998	4.12106
8	control	week1	119.324	106.414	-12.9094
9	control	week1	92.1187	103.567	11.4486
10	control	week1	106.289	173.661	67.3726
11	control	week1	111.421	143.541	32.1201
12	control	week1	107.527	107.303	-0.224348
13	control	week1	80.9535	89.2414	8.288
14	control	week1	91.2316	91.5798	0.348124
15	control	week1	116.845	117.878	1.03301
16	CBD1	week1	87.4211	87.8906	0.469547
17	CBD1	week1	88.9768	96.6962	7.71945
18	CBD1	week1	136.986	104.865	-32.1218
19	CBD1	week1	98.3069	124.654	26.3468
20	CBD1	week1	124.957	133.284	8.32736
21	CBD1	week1	108.173	103.389	-4.78422
22	CBD1	week1	97.271	112.324	15.0535
23	CBD1	week1	114.467	112.817	-1.65011
24	CBD1	week1	139.319	128.205	-11.1138
25	CBD1	week1	135.084	134.228	-0.85624
26	CBD1	week1	110.803	98.0125	-12.7908
27	CBD1	week1	84.2697	86.2895	2.01989
28	CBD1	week1	96.4889	103.034	6.5449
29	CBD1	week1	90.978	110.837	19.8594
30	CBD1	week1	109.489	97.166	-12.3231
31	CBD10	week1	106.635	135.44	28.8051
32	CBD10	week1	101.067	126.538	25.471
33	CBD10	week1	121.335	108.368	-12.9662
34	CBD10	week1	110.803	135.287	24.4842
35	CBD10	week1	115.126	139.969	24.8426
36	CBD10	week1	174.419	146.64	-27.7791
37	CBD10	week1	123.035	119.443	-3.59226
38	CBD10	week1	125.043	125.567	0.523377
39	CBD10	week1	184.615	192.205	7.58963
40	CBD10	week1	142.18	182.834	40.6538
41	CBD10	week1	140.735	159.363	18.6276
42	CBD10	week1	113.03	112.01	-1.01987
43	CBD10	week1	144.811	152.22	7.40893
44	CBD10	week1	104.773	146.759	41.9861
45	CBD10	week1	184.521	168.224	-16.2965
46	CBD20	week1	103.986	135.952	31.9655
47	CBD20	week1	129.496	133.432	3.93577
48	CBD20	week1	96.0512	115.979	19.9282
49	CBD20	week1	134.529	167.91	33.3813
50	CBD20	week1	117.724	89.1972	-28.5268
51	CBD20	week1	84.6262	85.2071	0.580866
52	CBD20	week1	99.1189	87.2516	-11.8674
53	CBD20	week1	126.095	107.688	-18.4069
54	CBD20	week1	125.654	115.681	-9.97322
55	CBD20	week1	133.978	111.386	-22.5923
56	CBD20	week1	105.386	130.814	25.4275
57	CBD20	week1	128.342	126.805	-1.53703
58	CBD20	week1	160.786	157.895	-2.89133
59	CBD20	week1	147.965	150.439	2.47331
60	CBD20	week1	118.851	116.656	-2.19524
1	control	week2	146.163	153.912	7.74871
2	control	week2	99.6678	93.3126	-6.35518
3	control	week2	119.482	131.483	12.0006
4	control	week2	102.506	98.1729	-4.3328
5	control	week2	121.212	130.862	9.64938
6	control	week2	131.723	148.576	16.8528
7	control	week2	90.6801	166.898	76.2184
8	control	week2	110.701	127.253	16.5523
9	control	week2	92.6164	91.954	-0.662391
10	control	week2	116.505	126.805	10.3004
11	control	week2	144.578	127.343	-17.2348
12	control	week2	104.499	131.627	27.1278
13	control	week2	95.9233	96.3597	0.436482
14	control	week2	98.8197	92.001	-6.81863
15	control	week2	136.674	140.955	4.2811
16	CBD1	week2	123.457	145.161	21.7045
17	CBD1	week2	90.3161	100.251	9.93452
18	CBD1	week2	144.869	136.622	-8.24682
19	CBD1	week2	100.699	130.105	29.4055
20	CBD1	week2	107.849	129.964	22.1149
21	CBD1	week2	132.548	105.789	-26.7589
22	CBD1	week2	110.328	107.335	-2.99339
23	CBD1	week2	116.167	132.792	16.6258
24	CBD1	week2	135.491	133.284	-2.20719
25	CBD1	week2	147.119	151.835	4.71575
26	CBD1	week2	104.137	98.6842	-5.45232
27	CBD1	week2	90.0901	91.6964	1.60629
28	CBD1	week2	116.017	126.05	10.0337
29	CBD1	week2	107.881	121.376	13.4943
30	CBD1	week2	111.455	108.499	-2.95601
31	CBD10	week2	118.382	124.783	6.40125
32	CBD10	week2	103.004	95.1877	-7.81656
33	CBD10	week2	97.0874	95.6683	-1.41903
34	CBD10	week2	104.076	120.482	16.4056
35	CBD10	week2	107.463	146.699	39.2366
36	CBD10	week2	111.077	146.282	35.2052
37	CBD10	week2	139.211	119.601	-19.6098
38	CBD10	week2	127.389	114.032	-13.3562
39	CBD10	week2	177.866	191.184	13.3187
40	CBD10	week2	101.839	152.672	50.833
41	CBD10	week2	142.349	139.265	-3.08376
42	CBD10	week2	98.2533	109.756	11.5028
43	CBD10	week2	124.138	122.951	-1.18711
44	CBD10	week2	96.8784	114.322	17.4436
45	CBD10	week2	121.335	140.625	19.2903
46	CBD20	week2	80.089	106.635	26.5461
47	CBD20	week2	120.603	148.27	27.6672
48	CBD20	week2	102.244	123.542	21.2978
49	CBD20	week2	138.408	156.59	18.1815
50	CBD20	week2	85.796	87.3786	1.58264
51	CBD20	week2	135.644	83.5267	-52.1176
52	CBD20	week2	98.3338	109.489	11.1553
53	CBD20	week2	127.524	125.13	-2.39357
54	CBD20	week2	107.784	98.0125	-9.77191
55	CBD20	week2	120.887	111.871	-9.01577
56	CBD20	week2	111.043	153.257	42.2141
57	CBD20	week2	123.839	131.965	8.1258
58	CBD20	week2	144.346	143.655	-0.691204
59	CBD20	week2	129.125	163.711	34.586
60	CBD20	week2	109.157	93.3126	-15.8445
1	control	week3	129.403	149.13	19.7268
2	control	week3	108.271	109.091	0.820232
3	control	week3	132.646	139.643	6.99759
4	control	week3	130.909	138.462	7.55245
5	control	week3	107.399	142.349	34.9502
6	control	week3	130.435	177.427	46.9925
7	control	week3	107.527	111.593	4.06642
8	control	week3	117.763	127.886	10.1238
9	control	week3	130.814	134.63	3.81581
10	control	week3	100.056	126.404	26.3489
11	control	week3	158.59	153.78	-4.80987
12	control	week3	105.789	134.983	29.1941
13	control	week3	109.389	112.57	3.18111
14	control	week3	94.8617	111.906	17.0438
15	control	week3	130.719	158.66	27.9412
16	CBD1	week3	111.248	110.872	-0.376881
17	CBD1	week3	83.237	87.0617	3.82467
18	CBD1	week3	109.991	94.7867	-15.2041
19	CBD1	week3	103.717	114.943	11.226
20	CBD1	week3	125.261	143.483	18.2225
21	CBD1	week3	147.723	107.72	-40.0027
22	CBD1	week3	107.239	107.399	0.159962
23	CBD1	week3	101.551	117.379	15.8271
24	CBD1	week3	145.572	154.242	8.66947
25	CBD1	week3	131.531	131.965	0.433936
26	CBD1	week3	96.7742	90.955	-5.81917
27	CBD1	week3	100.615	111.663	11.0477
28	CBD1	week3	107.752	111.94	4.18813
29	CBD1	week3	108.206	132.159	23.953
30	CBD1	week3	107.239	117.149	9.91076
31	CBD10	week3	108.926	110.701	1.77524
32	CBD10	week3	104.287	113.529	9.24149
33	CBD10	week3	87.3362	103.746	16.4102
34	CBD10	week3	113.101	103.181	-9.91942
35	CBD10	week3	115.756	134.68	18.9245
36	CBD10	week3	146.401	156.794	10.3934
37	CBD10	week3	106.92	121.704	14.7837
38	CBD10	week3	97.7199	96.2824	-1.43744
39	CBD10	week3	199.778	168.856	-30.9225
40	CBD10	week3	107.527	96.463	-11.0639
41	CBD10	week3	145.161	150.943	5.78211
42	CBD10	week3	93.7256	103.152	9.42627
43	CBD10	week3	123.626	138.462	14.8352
44	CBD10	week3	119.96	127.75	7.79016
45	CBD10	week3	124.697	135.644	10.9474
46	CBD20	week3	80.6271	112.782	32.1549
47	CBD20	week3	135.644	136.778	1.13381
48	CBD20	week3	104.865	111.421	6.55606
49	CBD20	week3	137.3	148.27	10.9704
50	CBD20	week3	88.5391	102.447	13.9082
51	CBD20	week3	73.4694	83.045	9.57559
52	CBD20	week3	112.853	109.223	-3.62936
53	CBD20	week3	96.8002	130.482	33.6818
54	CBD20	week3	113.279	105.976	-7.30293
55	CBD20	week3	137.195	116.204	-20.9911
56	CBD20	week3	123.754	121.498	-2.25539
57	CBD20	week3	123.967	132.939	8.9725
58	CBD20	week3	132.062	127.864	-4.19802
59	CBD20	week3	165.213	169.731	4.51786
60	CBD20	week3	106.132	127.886	21.7542
1	control	week4	134.378	133.63	-0.74821
2	control	week4	92.9272	92.2604	-0.666828
3	control	week4	139.697	137.878	-1.81911
4	control	week4	112.959	122.574	9.61516
5	control	week4	110.092	124.827	14.7349
6	control	week4	116.129	146.64	30.5105
7	control	week4	107.752	124.697	16.9447
8	control	week4	126.139	125.962	-0.176541
9	control	week4	95.5414	102.593	7.05193
10	control	week4	82.8157	94.8367	12.0209
11	control	week4	117.878	152.478	34.5996
12	control	week4	101.868	108.499	6.63152
13	control	week4	99.3103	87.7835	-11.5269
14	control	week4	94.1176	105.665	11.5472
15	control	week4	141.732	153.453	11.7204
16	CBD1	week4	105.541	107.784	2.24353
17	CBD1	week4	82.4176	85.1466	2.72906
18	CBD1	week4	121.049	98.4144	-22.6347
19	CBD1	week4	98.8197	105.882	7.0627
20	CBD1	week4	113.493	143.541	30.0476
21	CBD1	week4	128.571	109.79	-18.7819
22	CBD1	week4	112.535	135.952	23.4165
23	CBD1	week4	109.091	113.78	4.68912
24	CBD1	week4	149.007	131.627	-17.3796
25	CBD1	week4	139.05	131.387	-7.66296
26	CBD1	week4	94.3891	98.1461	3.75704
27	CBD1	week4	91.9071	113.422	21.5145
28	CBD1	week4	120.442	151.643	31.2012
29	CBD1	week4	94.3891	108.076	13.6866
30	CBD1	week4	115.163	121.54	6.37635
31	CBD10	week4	118.969	110.531	-8.43777
32	CBD10	week4	100.195	97.271	-2.92382
33	CBD10	week4	88.2569	98.6572	10.4002
34	CBD10	week4	104.197	118.11	13.9134
35	CBD10	week4	129.59	137.195	7.60549
36	CBD10	week4	115.016	138.302	23.286
37	CBD10	week4	88.7574	106.038	17.2809
38	CBD10	week4	89.0428	93.0714	4.02856
39	CBD10	week4	155.239	164.534	9.29449
40	CBD10	week4	104.803	97.5081	-7.29537
41	CBD10	week4	144.986	152.542	7.55647
42	CBD10	week4	71.9712	90.5888	18.6176
43	CBD10	week4	131.772	138.889	7.11729
44	CBD10	week4	106.635	102.506	-4.12938
45	CBD10	week4	125.392	107.271	-18.1213
46	CBD20	week4	83.7599	108.466	24.7065
47	CBD20	week4	131.483	143.827	12.3446
48	CBD20	week4	91.8133	102.916	11.1026
49	CBD20	week4	132.402	136.467	4.0654
50	CBD20	week4	97.7199	107.946	10.2262
51	CBD20	week4	94.1176	89.1089	-5.00874
52	CBD20	week4	91.1623	89.3744	-1.78794
53	CBD20	week4	101.095	102.623	1.52738
54	CBD20	week4	119.96	108.63	-11.33
55	CBD20	week4	111.111	105.634	-5.47731
56	CBD20	week4	123.839	127.208	3.36947
57	CBD20	week4	122.574	116.732	-5.84254
58	CBD20	week4	135.849	134.579	-1.26962
59	CBD20	week4	129.543	139.589	10.046
60	CBD20	week4	105.758	96.8263	-8.93168

## Sheet: Descriptve statistics
VR pre-social stimulus (beats/min) (N=15)					VR post-social stimulus (beats/min) (N=15)					ΔVR (beats/min (N=15)
Treatment	Sampling Time Point	Mean	Standard Deviation		Treatment	Sampling Time Point	Mean	Standard Deviation		Treatment	Sampling Time Point	Mean	Standard Deviation
control	basal	119.345	14.8794		control	basal	80.8278	26.8593		control	basal	24.389	22.1498
CBD1	basal	116.075	17.4806		CBD1	basal	69.2488	19.6643		CBD1	basal	11.2112	21.3755
CBD10	basal	117.185	23.2532		CBD10	basal	125.242	22.9795		CBD10	basal	8.05713	15.2723
CBD20	basal	111.066	9.7585		CBD20	basal	116.094	17.8677		CBD20	basal	5.02763	13.5162
control	week1	103.718	15.3574		control	week1	115.137	26.1931		control	week1	11.4183	21.3262
CBD1	week1	108.199	18.6573		CBD1	week1	108.913	15.4148		CBD1	week1	0.713394	14.5914
CBD10	week1	132.809	28.4584		CBD10	week1	143.391	24.5493		CBD10	week1	10.5826	20.8907
CBD20	week1	120.839	20.3676		CBD20	week1	122.153	24.9144		CBD20	week1	1.31349	19.0764
control	week2	114.117	18.6755		control	week2	123.834	24.2613		control	week2	9.7176	21.5665
CBD1	week2	115.895	17.7322		CBD1	week2	121.296	18.1615		CBD1	week2	5.40137	14.408
CBD10	week2	118.023	22.1618		CBD10	week2	128.901	24.7254		CBD10	week2	10.8776	19.8589
CBD20	week2	115.655	18.7911		CBD20	week2	122.423	26.3947		CBD20	week2	6.76812	23.7377
control	week3	119.638	16.8957		control	week3	135.234	19.6017		control	week3	15.5963	14.7879
CBD1	week3	112.51	17.7392		CBD1	week3	115.581	18.6208		CBD1	week3	3.07069	15.4321
CBD10	week3	119.302	28.7113		CBD10	week3	123.303	23.6		CBD10	week3	4.00136	13.5889
CBD20	week3	115.447	24.6537		CBD20	week3	122.437	20.6936		CBD20	week3	6.98991	14.6123
control	week4	111.556	17.9144		control	week4	120.918	21.6221		control	week4	9.36261	12.1184
CBD1	week4	111.724	18.251		CBD1	week4	117.075	18.4855		CBD1	week4	5.351	16.925
CBD10	week4	111.655	23.0021		CBD10	week4	116.868	23.4626		CBD10	week4	5.21286	11.4275
CBD20	week4	111.479	17.5361		CBD20	week4	113.995	18.1147		CBD20	week4	2.51602	9.74312
