# Supplementary material for: Cannabidiol improves Nile tilapia cichlid fish welfare
Source: Sci Rep. 2022 Oct 21;12:17650. doi: 10.1038/s41598-022-21759-3 (PMC9586945; doi:10.1038/s41598-022-21759-3)
Supplement: Supplementary file 8 — Supplementary Table 2. [file 41598_2022_21759_MOESM8_ESM.xlsx]

## Sheet: Data set
fishID	treatment	Initial weight (g)	Final weight (g)	Final standard length (cm)	AWG (g)	Feed consumption (g)	FC (g/g)	SGR (%)	K (%)
1	control	35	50	11	15	28.8232	1.92154	1.01907	3.75657
2	control	30	45	11.2	15	27.9693	1.86462	1.15847	3.20301
3	control	35	50	11.2	15	26.9078	1.79385	1.01907	3.5589
4	control	35	60	11.6	25	28.6155	1.14462	1.53999	3.84395
5	control	30	55	11.1	25	28.8232	1.15293	1.73182	4.02155
6	control	30	50	11.2	20	28.6386	1.43193	1.4595	3.5589
7	control	25	30	9.5	5	23.1232	4.62463	0.520919	3.49905
8	control	30	50	11.9	20	28.3155	1.41577	1.4595	2.96708
9	control	30	55	11.9	25	28.6386	1.14554	1.73182	3.26379
10	control	30	55	11.5	25	28.5232	1.14093	1.73182	3.61634
11	control	30	30	11.3	0	28.0386		0	2.07915
12	control	25	45	10.6	20	26.6309	1.33154	1.67939	3.77829
13	control	30	50	11	20	28.6155	1.43077	1.4595	3.75657
14	control	30	45	11	15	28.2232	1.88154	1.15847	3.38092
15	control	25	35	9.6	10	21.1155	2.11155	0.961349	3.95598
16	CBD1	35	50	11.1	15	27.6924	1.84616	1.01907	3.65596
17	CBD1	35	55	11.5	20	28.8232	1.44116	1.29139	3.61634
18	CBD1	35	55	12.5	20	28.7539	1.4377	1.29139	2.816
19	CBD1	30	40	10.5	10	20.9539	2.09539	0.821949	3.45535
20	CBD1	25	45	10.9	20	28.0386	1.40193	1.67939	3.47483
21	CBD1	25	55	11.5	30	28.5001	0.950003	2.25274	3.61634
22	CBD1	30	60	12	30	28.477	0.949234	1.98042	3.47222
23	CBD1	30	55	11.2	25	28.7539	1.15016	1.73182	3.91479
24	CBD1	30	45	10.6	15	27.577	1.83847	1.15847	3.77829
25	CBD1	30	45	11	15	24.7155	1.6477	1.15847	3.38092
26	CBD1	30	50	11.9	20	28.8232	1.44116	1.4595	2.96708
27	CBD1	30	35	10	5	21.2078	4.24155	0.440431	3.5
28	CBD1	30	35	10	5	24.7847	4.95694	0.440431	3.5
29	CBD1	25	40	10.2	15	25.4539	1.69693	1.34287	3.76929
30	CBD1	25	50	11.5	25	28.6847	1.14739	1.98042	3.28758
31	CBD10	25	50	11.1	25	28.8232	1.15293	1.98042	3.65596
32	CBD10	25	45	10.7	20	26.5386	1.32693	1.67939	3.67334
33	CBD10	25				28.6155
34	CBD10	25	40	10.55	15	25.6385	1.70924	1.34287	3.40645
35	CBD10	30	50	11.3	20	28.2924	1.41462	1.4595	3.46525
36	CBD10	30	40	10.5	10	23.7232	2.37232	0.821949	3.45535
37	CBD10	30	55	11.9	25	28.4309	1.13723	1.73182	3.26379
38	CBD10	30	50	11.4	20	28.8001	1.44	1.4595	3.37486
39	CBD10	30	45	10.6	15	24.6232	1.64154	1.15847	3.77829
40	CBD10	30	55	11.6	25	28.8232	1.15293	1.73182	3.52362
41	CBD10	35	45	11.1	10	22.1308	2.21308	0.718041	3.29036
42	CBD10	30	45	10.6	15	28.2001	1.88001	1.15847	3.77829
43	CBD10	30	30	10	0	20.1001		0	3
44	CBD10	30	44	11.1	14	25.2924	1.8066	1.09426	3.21724
45	CBD10	25	40	10.6	15	22.1078	1.47385	1.34287	3.35848
46	CBD20	25	30	10	5	19.9847	3.99694	0.520919	3
47	CBD20	25	40	10.2	15	26.5847	1.77231	1.34287	3.76929
48	CBD20	25	35	10.4	10	20.6078	2.06078	0.961349	3.11149
49	CBD20	25	35	9.9	10	21.5078	2.15078	0.961349	3.60714
50	CBD20	35	60	12	25	28.2924	1.1317	1.53999	3.47222
51	CBD20	30	55	11.8	25	28.6386	1.14554	1.73182	3.34747
52	CBD20	30	55	12	25	28.8001	1.152	1.73182	3.18287
53	CBD20	30	60	11.8	30	28.8232	0.960772	1.98042	3.65179
54	CBD20	30	45	10.9	15	28.5232	1.90154	1.15847	3.47483
55	CBD20	30	55	11.5	25	28.8232	1.15293	1.73182	3.61634
56	CBD20	30	55	11.5	25	28.8001	1.152	1.73182	3.61634
57	CBD20	30	40	10.44	10	23.4924	2.34924	0.821949	3.51527
58	CBD20	25	45	11	20	26.3078	1.31539	1.67939	3.38092
59	CBD20	30	35	10.2	5	20.2385	4.04771	0.440431	3.29813
60	CBD20	25	35	10	10	22.9847	2.29847	0.961349	3.5

## Sheet: Descriptve statistics
Initial weight (g) (N=15)				Final weight (g) (N=15)				Final standard length (cm) (N=15)				AWG (g) (N=15)
Treatment	Mean	Standard Deviation (SD)		Treatment	Mean	SD		Treatment	Mean	SD		Treatment	Mean	SD
control	30	3.27327		control	47	9.02378		control	11.04	0.696727		control	17	7.5119
CBD1	29.6667	3.51866		CBD1	47.6667	7.76132		CBD1	11.0933	0.745909		CBD1	18	7.74597
CBD10	28.6667	2.96808		CBD10	45.2857	6.6498		CBD10	10.9321	0.512012		CBD10	16.3571	6.93494
CBD20	28.3333	3.08607		CBD20	45.3333	10.4312		CBD20	10.9093	0.794188		CBD20	17	8.40918
Feed consumption (g) (N=15)				FC (g/g) (N=15)				SGR (%) (N=15)				K (%) (N=15)
Treatment	Mean	SD		Treatment	Mean	SD		Treatment	Mean	SD		Treatment	Mean	SD
control	27.4001	2.27099		control	1.74227	0.894616		control	1.24205	0.492546		control	3.48267	0.484348
CBD1	26.7493	2.72083		CBD1	1.88279	1.15854		CBD1	1.33658	0.534298		CBD1	3.48033	0.290586
CBD10	26.0093	2.92227		CBD10	1.59394	0.394859		CBD10	1.26281	0.507985		CBD10	3.4458	0.222923
CBD20	25.4939	3.5938		CBD20	1.90587	0.983268		CBD20	1.28638	0.489013		CBD20	3.43627	0.216223
